# Supplementary material for: Plasma Globotriaosylsphingosine and ?-Galactosidase A Activity as a Combined Screening Biomarker for Fabry Disease in a Large Japanese Cohort
Source: MDPI journal article supplement (doi:10.3390/cimb43010032), 2021-06-19
Supplement: s1 [file s1]

# **Plasma Globotriaosylsphingosine and $\alpha$ -Galactosidase A Activity as a Combined Screening Biomarker for Fabry Disease in a Large Japanese Cohort**

## **1. SUPPLEMENTARY FIGURE**

**Supplementary Figure S1**

## **2. SUPPLEMENTARY TABLE**

**Supplementary Table S1**

## **3. SUPPLEMENTARY REFERENCES**

## **4. SUPPLEMENTARY ACKNOWLEDGMENTS**

# 1. SUPPLEMENTARY FIGURE

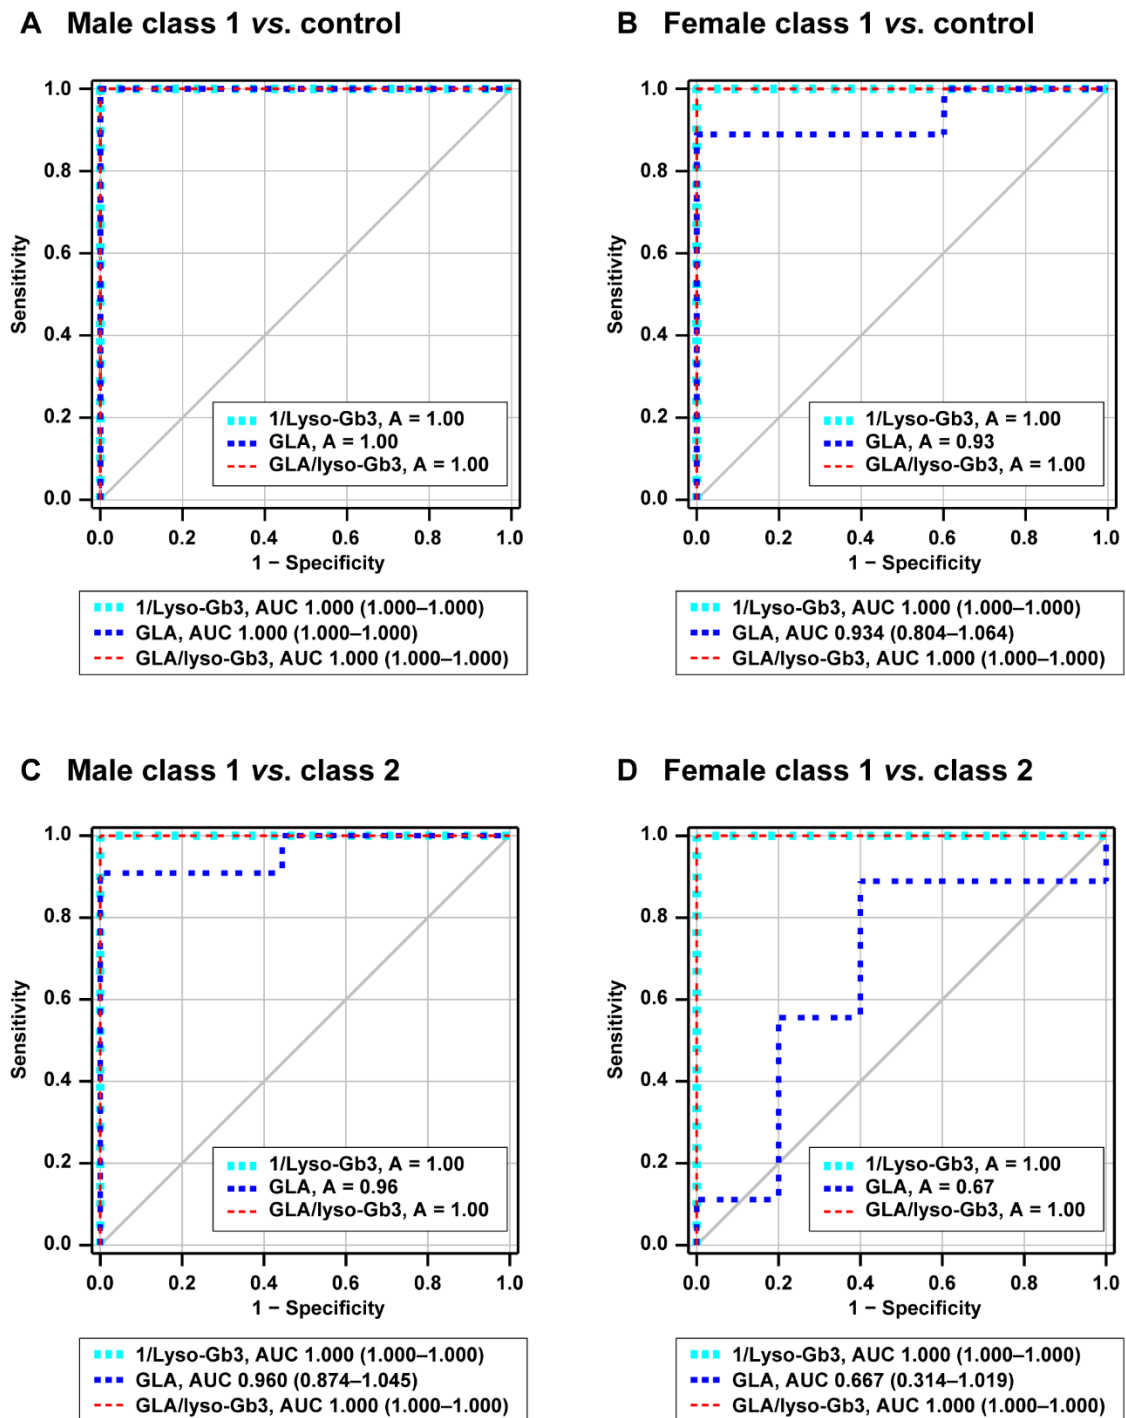

**Supplementary Figure S1. Comparison of receiver operating characteristic (ROC) curves for plasma 1/lyso-Gb3 levels, GLA activity, and GLA/lyso-Gb3 ratio for male and female patients enrolled from 2014 to 2016. When plasma lyso-Gb3 values were less than the detection limit of the assay (0.01 nmol/h/mL), a value of 0 ng/mL was used to represent the lyso-Gb3 levels in the statistical analysis. (A)**

Discrimination between male patients with a class 1 variant ( $n = 11$ ) and controls ( $n = 3243$ ). Because 156 of the 3399 control males had a lyso-Gb3 level of 0 (see Figure 4A), these patients were excluded from the analysis. **(B)** Discrimination between female patients with a class 1 variant ( $n = 9$ ) and controls ( $n = 2089$ ). Because 123 of the 2212 control males had a lyso-Gb3 level of 0 (see Figure 4C), these patients were excluded from the analysis. **(C)** Discrimination between male patients with class 1 ( $n = 11$ ) and class 2 ( $n = 9$ ) variants. Because 1 of the 10 class 2 males had a lyso-Gb3 level of 0 (see Figure 4A), this patient was excluded from the analysis. **(D)** Discrimination between female patients with class 1 ( $n = 9$ ) and class 2 ( $n = 5$ ) variants.

## 2. SUPPLEMENTARY TABLE

**Supplementary Table S1.** *GLA* variants identified by screening for Fabry disease in young patients with cerebrovascular diseases.

| References<br>(year of publication)          | Participants (n) |             |       | Fabry disease   |                                         | Class 1<br>variants<br>(n) |
|----------------------------------------------|------------------|-------------|-------|-----------------|-----------------------------------------|----------------------------|
|                                              | Males            | Female<br>s | Total | diagnosis (n)   | <i>GLA</i> variants                     |                            |
| Rolfs <i>et al.</i> (2005) <sup>S1</sup>     | 432              | 289         | 721   | 28              | Not reported                            | 0                          |
| Brouns <i>et al.</i> (2007) <sup>S2</sup>    | 64               | 39          | 103   | 0               | None                                    | 0                          |
| Wozniak <i>et al.</i> (2010) <sup>S3</sup>   | 558              | 0           | 558   | 1               | p.Ala143Thr (FD-causing) <sup>1</sup>   | 0                          |
|                                              |                  |             |       | 0               | p.Asp313Tyr (polymorphism) <sup>1</sup> | 0                          |
| Baptista <i>et al.</i> (2010) <sup>S4</sup>  | 300              | 193         | 493   | 2               | c.-44C>T                                | 0                          |
|                                              |                  |             |       | 6               | p.Arg118Cys                             | 0                          |
|                                              |                  |             |       | 6               | p.Asp313Tyr                             | 0                          |
| Brouns <i>et al.</i> (2010) <sup>S5</sup>    | –                | –           | 842   | 1               | p.Ser126Gly <sup>1</sup>                | 0                          |
|                                              |                  |             |       | 2               | p.Ala143Thr <sup>1</sup>                | 0                          |
|                                              |                  |             |       | 3               | p.Asp313Tyr <sup>1</sup>                | 0                          |
| Sarikaya <i>et al.</i> (2012) <sup>S6</sup>  | 102              | 48          | 150   | 0               | None                                    | 0                          |
| Marquardt <i>et al.</i> (2012) <sup>S7</sup> | 85               | 69          | 154   | 0               | None <sup>2</sup>                       | 0                          |
| Rolfs <i>et al.</i> (2013) <sup>S8</sup>     |                  |             | 5023  | 27 <sup>3</sup> |                                         | 0                          |
|                                              |                  |             |       |                 | p.Asp83Asn <sup>1</sup>                 |                            |
|                                              |                  |             |       |                 | p.Ser102Leu <sup>1</sup>                |                            |
|                                              |                  |             |       |                 | p.Arg118Cys <sup>1</sup>                |                            |
|                                              |                  |             |       |                 | p.Ser126Gly <sup>1</sup>                |                            |

|                                               |     |     |                  |                      |                                                                                                                                                                    |                      |
|-----------------------------------------------|-----|-----|------------------|----------------------|--------------------------------------------------------------------------------------------------------------------------------------------------------------------|----------------------|
|                                               |     |     |                  |                      | p.Ala143Thr <sup>1</sup><br>p.Val316Ile <sup>1</sup><br>p.Leu415Phe <sup>1</sup><br>p.Glu418Gly <sup>1</sup>                                                       |                      |
| Dubuc <i>et al.</i> (2013) <sup>S9</sup>      | 55  | 45  | 100              | 1                    | c.-10C>T,<br>c.370-81_370-77delCAGCC,<br>c.640-16A>G,<br>c.1000-22C>T                                                                                              | 0                    |
| Fancellu <i>et al.</i> (2015) <sup>S10</sup>  | –   | –   | 148              | 1<br>1               | p.Arg227Gln <sup>1,4</sup><br>p.Asp313Tyr <sup>1</sup>                                                                                                             | 1<br>0               |
| Lanthier <i>et al.</i> (2017) <sup>S11</sup>  | 218 | 179 | 397              | 1<br>0<br>0<br><br>0 | p.Arg118Cys<br>p.Asp313Tyr (neutral)<br>c.-10C>T,<br>c.370-81_370-77delCAGCC,<br>c.640-16A>G,<br>c.1000-22C>T (neutral)<br>c.1000-22C>T,<br>c.1290+43A>G (neutral) | 0<br>0<br>0<br><br>0 |
| Kinoshita <i>et al.</i> (2018) <sup>S12</sup> | 394 | 120 | 516              | 0                    | p.Glu66Gln (non-pathogenic) <sup>1</sup>                                                                                                                           | 0                    |
| Maruyama <i>et al.</i> (2019) <sup>S13</sup>  | 281 | 220 | 501 <sup>5</sup> | 0                    | None                                                                                                                                                               | 0                    |

The methods of *GLA* analyses:

<sup>1</sup> Only the protein variants were described with no description of the method of gene analysis; therefore, the DNA variants were not classified based on the Human Genome Variation Society recommendations.

<sup>2</sup> Five patients who had the *GLA* variant p.Asp313Tyr were excluded because they were over 60 years old.

<sup>3</sup> The number of each *GLA* variant was not described.

<sup>4</sup> The male proband with classic Fabry disease (p.Arg227Gln) exhibited acroparesthesia, multiple white matter lesions, and severe cardiac and renal involvement.

<sup>5</sup> Patients with cerebrovascular disease referred from neurology.

### 3. SUPPLEMENTARY REFERENCES

- S1. Rolfs, A.; Böttcher, T.; Zschesche, M.; Morris, P.; Winchester, B.; Bauer, P.; Walter, U.; Mix, E.; Löhr, M.; Harzer, K.; et al. Prevalence of Fabry disease in patients with cryptogenic stroke: a prospective study. *Lancet* **2005**, *366*, 1794–1796, doi:10.1016/S0140-6736(05)67635-0.
- S2. Brouns, R.; Sheorajpanday, R.; Braxel, E.; Eyskens, F.; Baker, R.; Hughes, D.; Mehta, A.; Timmerman, T.; Vincent, M.F.; De Deyn, P.P. Middelheim Fabry Study (MiFaS): a retrospective Belgian study on the prevalence of Fabry disease in young patients with cryptogenic stroke. *Clin. Neurol. Neurosurg.* **2007**, *109*, 479–484, doi:10.1016/j.clineuro.2007.03.008.
- S3. Wozniak, M.A.; Kittner, S.J.; Tuhim, S.; Cole, J.W.; Stern, B.; Dobbins, M.; Grace, M.E.; Nazarenko, I.; Dobrovolsky, R.; McDade, E.; et al. Frequency of unrecognized Fabry disease among young European-American and African-American men with first ischemic stroke. *Stroke* **2010**, *41*, 78–81, doi:10.1161/STROKEAHA.109.558320.
- S4. Baptista, M.V.; Ferreira, S.; Pinho-E-Melo, T.; Carvalho, M.; Cruz, V.T.; Carmona, C.; Silva, F.A.; Tuna, A.; Rodrigues, M.; Ferreira, C.; et al. Mutations of the *GLA* gene in young patients with stroke: the PORTYSTROKE study—screening genetic conditions in Portuguese young stroke patients. *Stroke* **2010**, *41*, 431–436, doi:10.1161/STROKEAHA.109.570499.
- S5. Brouns, R.; Thijs, V.; Eyskens, F.; Van den Broeck, M.; Belachew, S.; Van Broeckhoven, C.; Redondo, P.; Hemelsoet, D.; Fumal, A.; Jeangette, S.; et al. Belgian Fabry study: prevalence of Fabry disease in a cohort of 1000 young patients with cerebrovascular disease. *Stroke* **2010**, *41*, 863–868, doi:10.1161/STROKEAHA.110.579409.
- S6. Sarikaya, H.; Yilmaz, M.; Michael, N.; Miserez, A.R.; Steinmann, B.; Baumgartner, R.W. Zurich Fabry study—prevalence of Fabry disease in young patients with first cryptogenic ischaemic stroke or TIA. *Eur. J. Neurol.* **2012**, *19*, 1421–1426, doi:10.1111/j.1468-1331.2012.03737.x.
- S7. Marquardt, L.; Baker, R.; Segal, H.; Burgess, A.I.; Poole, D.; Hughes, D.A.; Rothwell, P.M. Fabry disease in unselected patients with TIA or stroke: population-based study. *Eur. J. Neurol.* **2012**, *19*, 1427–1432, doi:10.1111/j.1468-1331.2012.03739.x.
- S8. Rolfs, A.; Fazekas, F.; Grittner, U.; Dichgans, M.; Martus, P.; Holzhausen, M.; Böttcher, T.; Heuschmann, P.U.; Tatlisumak, T.; Tanislav, C.; et al. Acute cerebrovascular disease in the young: the stroke in young Fabry patients study. *Stroke* **2013**, *44*, 340–349, doi:10.1161/STROKEAHA.112.663708.
- S9. Dubuc, V.; Moore, D.F.; Gioia, L.C.; Saposnik, G.; Selchen, D.; Lanthier, S.

- Prevalence of Fabry disease in young patients with cryptogenic ischemic stroke. *J. Stroke Cerebrovasc. Dis.* **2013**, 22, 1288–1292, doi:10.1016/j.jstrokecerebrovasdis.2012.10.005.
- S10. Fancellu, L.; Borsini, W.; Romani, I.; Pirisi, A.; Deiana, G.A.; Sechi, E.; Doneddu, P.E.; Rassu, A.L.; Demurtas, R.; Scarabotto, A.; et al. Exploratory screening for Fabry's disease in young adults with cerebrovascular disorders in northern Sardinia. *BMC Neurol.* **2015**, 15, 256, doi:10.1186/s12883-015-0513-z.
- S11. Lanthier, S.; Saposnik, G.; Lebovic, G.; Pope, K.; Selchen, D.; Moore, D.F.; Canadian Fabry Stroke Screening Initiative Study Group. Prevalence of Fabry disease and outcomes in young Canadian patients with cryptogenic ischemic cerebrovascular events. *Stroke* **2017**, 48, 1766–1772, doi:10.1161/STROKEAHA.116.016083.
- S12. Kinoshita, N.; Hosomi, N.; Matsushima, H.; Nakamori, M.; Yagita, Y.; Yamawaki, T.; Torii, T.; Kitamura, T.; Sueda, Y.; Shimomura, R.; et al. Screening for Fabry disease in Japanese patients with young-onset stroke by measuring  $\alpha$ -galactosidase A and globotriaosylsphingosine. *J. Stroke Cerebrovasc. Dis.* **2018**, 27, 3563–3569, doi:10.1016/j.jstrokecerebrovasdis.2018.08.025.
- S13. Maruyama, H.; Miyata, K.; Mikame, M.; Taguchi, A.; Guili, C.; Shimura, M.; Murayama, K.; Inoue, T.; Yamamoto, S.; Sugimura, K.; et al. Effectiveness of plasma lyso-Gb3 as a biomarker for selecting high-risk patients with Fabry disease from multispecialty clinics for genetic analysis. *Genet. Med.* **2019**, 21, 44–52, doi:10.1038/gim.2018.31.



#### 4. SUPPLEMENTARY ACKNOWLEDGMENTS

The following physicians and centers participated in this study: Kazuhiro Aoki, Department of Cardiology, National Tokyo Hospital; Kenju Aoki, Neurological Center Agano Hospital; Nami Araya, Department of Pediatrics, Iwate Medical University; Tomoki Asai, Dialysis Center, Sagami Junkanki Clinic; Mio Ebato, Division of Cardiology, Showa University Fujigaoka Hospital; Kaoru Endo, Division of Neurology, Sendai City Hospital; Akihiro Fujii, Department of Neurology, Saiseikai Shiga Hospital; Makoto Furugen, Miyazaki Medical Association Hospital Cardiovascular Center; Nobuyuki Furuta, Division of Clinical Laboratory, Gifu University Hospital; Shoji Haruta, Department of Cardiology, Tokyo Women's Medical University, Yachiyo Medical Center; Tsuguhisa Hatano, Hatano Clinic, and Department of Cardiology Tokyo Medical University; Kyoko Hazama, Department of Neurology, Gunma Children's Medical Center; Shuma Hirashio, Department of Nephrology, Hiroshima University Hospital; Yukio Hiroi, Department of Cardiology, National Center for Global Health and Medicine; Manabu Hishida, Department of Nephrology, Nagoya University Hospital; Taro Horino, Department of Endocrinology, Metabolism and Nephrology, Kochi Medical School, Kochi University; Moritake Iguchi, Department of Cardiology, National Hospital Organization Kyoto Medical Center; Takeshi Inoue, Department of Pediatrics, Dokkyo Medical University Saitama Medical Center; Ayano Inui, Department of Pediatric Hepatology and Gastroenterology, Saiseikai Yokohamashi Tobu Hospital; Koji Ishiguro, Department of Neurology, Moteki Neurosurgery; Tetsuya Ito, Department of Pediatrics, Fujita Health University School of Medicine; Manabu Iwata, Hirosaki Stroke and Rehabilitation Center; Misako Kaido, Department of Neurology, Sakai City Medical Center; Kenji Kamiyama, Department of Neurosurgery, Nakamura Memorial Hospital; Bunta Kato, Department of Neurology, St. Marianna University School of Medicine, Yokohama City Seibu Hospital; Sanami Kawada, Department of Neurological Surgery, Okayama Kyokuto Hospital; Yuriko Kikkawa, Department of Neurology, Japanese Red Cross Society Narita Hospital; Masahiro Kikuchi, Department of Pediatrics, Hitachi General Hospital; Yukihiro Kimura, Division of Nephrology, Department of Internal Medicine, Gifu Municipal Hospital; Junya Kobayashi, Department of Vascular Neurology, National Hospital Organization Osaka Minami Medical Center; Yuji Koide, Department of Cardiovascular Medicine, Nagasaki University Hospital; Tomoyuki Kono, Department of Neurology, Kobe City Medical Center General Hospital; Toru Kubo, Department of Cardiology and Geriatrics, Kochi Medical School, Kochi University; Akiko Kumagai, Department of Internal Medicine, Division of Cardiology, Iwate Medical University; Yasuhiro Kumai, Department of Cerebrovascular Disease

and Neurology, Hakujuji Hospital; Azumi Kumazawa, Omaezaki Municipal Hospital; Yasuhiro Maejima, Department of Cardiovascular Medicine, Tokyo Medical and Dental University; Takahiro Maruta, Neurological Center, Kanazawa-Nishi Hospital; Masaki Matsunaga, Department of Cardiology, Iwata City Hospital; Takeshi Matsushige, Department of Pediatrics, Yamaguchi University Graduate School of Medicine; Ohsuke Migita, Department of Clinical Genetics, St. Marianna University School of Medicine; Yusaku Mochizuki, Department of Cardiology, Iwata City Hospital; Takayuki Momoo, Department of Neurology, Hiratsuka Kyosai Hospital; Yasuhiro Morita, Department of Cardiology, Ogaki Municipal Hospital; Chishio Munemura, Department of Nephrology, Tottori Prefectural Central Hospital; Kumiko Muta, Department of Nephrology, Nagasaki University Hospital; Shigemi Nagayama, Department of Neurology, Kanazawa Medical University; Kentaro Nakai, Division of Nephrology and Dialysis Center, Japanese Red Cross Fukuoka Hospital; Masahiko Nakamura, Department of Cardiology, Yamanashi Prefectural Central Hospital; Yumiko Nakashima, Department of Pediatrics, Nagasaki University Hospital; Mamoru Nanasato, Department of Cardiology, Sakakibara Heart Institute; Masayasu Nishimura, Department of Nephrology, Kyoto Okamoto Memorial Hospital; Mamoru Nobuhara, Department of Cardiology, Municipal Kosai Hospital; Takahisa Noma, Department of Cardioresenal and Cerebrovascular Medicine, Faculty of Medicine, Kagawa University; Akihiko Ogata, Department of Neurology, Hokkaido Neurosurgical Memorial Hospital; Makoto Ogi, Department of Internal Medicine, Yuurinkouseikai Fuji Hospital; Kazumasa Ohara, Internal Medicine, Saiseikai Toyama Hospital; Toshiyuki Ohta, Department of Pediatric Nephrology, Hiroshima Prefectural Hospital; Yasufumi Ohtsuka, Department of Pediatrics, Faculty of Medicine, Saga University; Takayuki Okamoto, Department of Pediatrics, Hokkaido University Graduate School of Medicine; Seiji Okubo, Department of Cerebrovascular Medicine, NTT Medical Center Tokyo; Reiko Saika, Department of Neurology, Shimane University Faculty of Medicine, and Department of Neurology, National Center Hospital, National Center of Neurology and Psychiatry; Rikizo Saito, Department of Neurosurgery, Koshigaya Municipal Hospital; Katsuyuki Sakai, Sakai Medical Clinic; Akie Sakamoto, Division of Neurology and Gerontology, Department of Internal Medicine, Iwate Medical University; Shunichi Satoh, Department of Neurology, Nagano Red Cross Hospital; Hideaki Sawai, Department of Clinical Genetics, Hyogo College of Medicine Hospital; Takashi Shiihara, Department of Neurology, Gunma Children's Medical Center; Yoshiko Shimamura, Department of Endocrinology, Metabolism and Nephrology, Kochi Medical School, Kochi University; Takashi Shimozato, Department of Cardiology, Nagoya Tokushukai General Hospital; Toshiyuki Sugawara, Department of Cardiology, Aomori City Hospital; Koichiro

Sugimura, Department of Cardiology, International University of Health and Welfare, Narita Hospital; Atsushi Suzuki, Department of Cardiology, Tokyo Women's Medical University; Yoshiharu Taguchi, Fukuokamachi Taguchi Clinic; Kazue Tajima, Department of Neurology, Kameda Medical Center; Hiroki Takano, Neurology Service, Tachikawa General Hospital; Yuka Takayanagi, Division of Clinical Laboratory, Kushiro Kojinkai Memorial Hospital; Satoru Takeda, Department of Cardiology, Hiraka General Hospital; Tomoko Tamaoki, Department of Clinical Genetics, Hyogo College of Medicine; Norie Tanaka-Saito, Division of Cardiology, Kushiro Kojinkai Memorial Hospital; Takahiro Tanaka, Department of Cardiology, Showa General Hospital; Kei Tawarahara, Department of Cardiology, Hamamatsu Red Cross Hospital; Tsuyoshi Torii, Department of Neurology, National Hospital Organization Kure Medical Center; Toshinori Ueno, Department of Nephrology, Hiroshima Prefectural Hospital; Shigehisa Ura, Department of Neurology, Japanese Red Cross Asahikawa Hospital; Minoru Wakasa, Department of Cardiology, Kanazawa Medical University; Hiroyuki Watanabe, Department of Cardiovascular Medicine, Akita University Graduate School of Medicine; Masao Yamasaki, Department of Cardiovascular Medicine, NTT Medical Center Tokyo; Eiji Yamashita, Department of Cardiology, Gunma Prefectural Cardiovascular Center; Kanemitsu Yamaya, Oyokyo Kidney Research Institute; Toshiyuki Yano, Department of Cardiovascular, Renal and Metabolic Medicine, Sapporo Medical University School of Medicine; Yukako Yazawa, Department of Stroke Neurology, Kohnan Hospital; Akio Yokochi, Department of Nephrology, Kanto Rosai Hospital; Hirokazu Yokoi, Department of Cardiology, Rakuwakai Otowa Hospital; Hidetoshi Yoshitani, Department of Cardiology, Takai Hospital.
